# Supplementary material
Source: Springer Nature journal article supplement (https://www.springermedizin.de/resource/supplementary/12958_2012_1114_MOESM14_ESM.pdf/9566844)

# Epididymis

IS

Cap

Cor

Cau

35

25

20

15

kDa

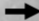

SPAG11A  
(20 kDa)

Tubulin

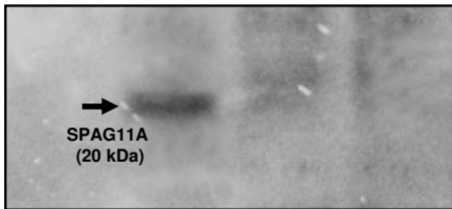

Supplement: MOESM14 [file 9566844]
